# Supplementary material for: Sequence-dependent off-target inhibition of TLR7/8 sensing by synthetic microRNA inhibitors
Source: PubMed Central journal article supplement (PMC4333393; doi:10.1093/nar/gku1343), 2014-12-24
Supplement: supp_gku1343_nar-02326-y-2014-File007.pdf [file supp_gku1343_nar-02326-y-2014-File007.pdf]

## Supplementary Data

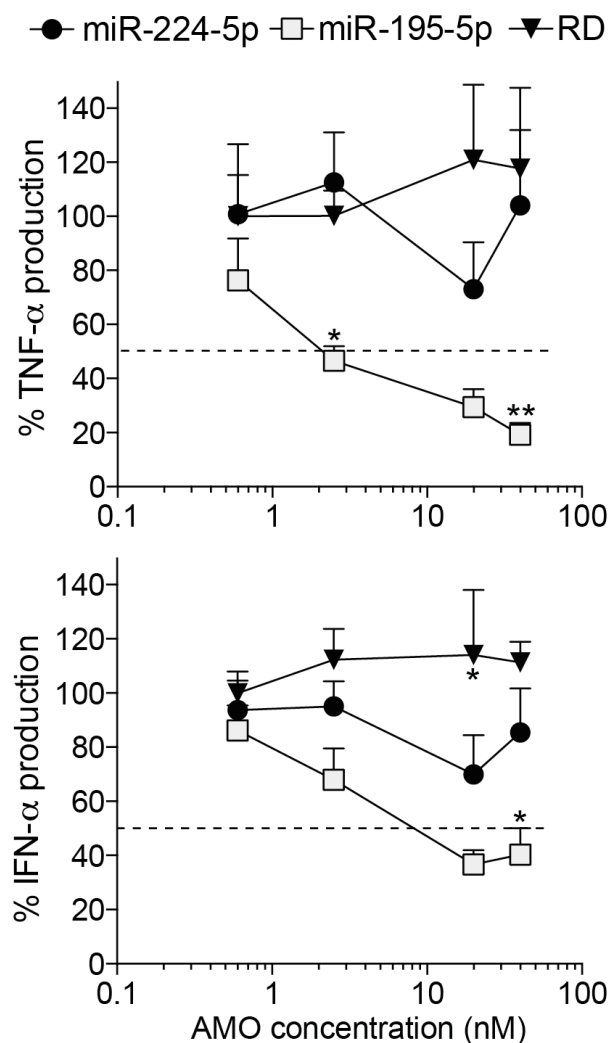

**Supplementary Figure S1.** Dose-dependent inhibition of TLR7/8 by 2'OMe AMOs. Human PBMCs were pre-treated for 45 min with the indicated dose of AMO or RD, and stimulated overnight with 180 nM of B-406AS-1. TNF- $\alpha$  and IFN- $\alpha$  levels were measured in supernatants by ELISA. The data are averaged from three independent experiments in different blood donors, in biological triplicate. Percentages of cytokine production compared to the 0.6 nM RD+B-406AS-1 condition are given. Ordinary one-way ANOVA with Dunnett's multiple comparison tests to the miR-224-5p+B-406AS-1 condition are shown. Unless otherwise indicated, differences were not significant. SEM is shown.

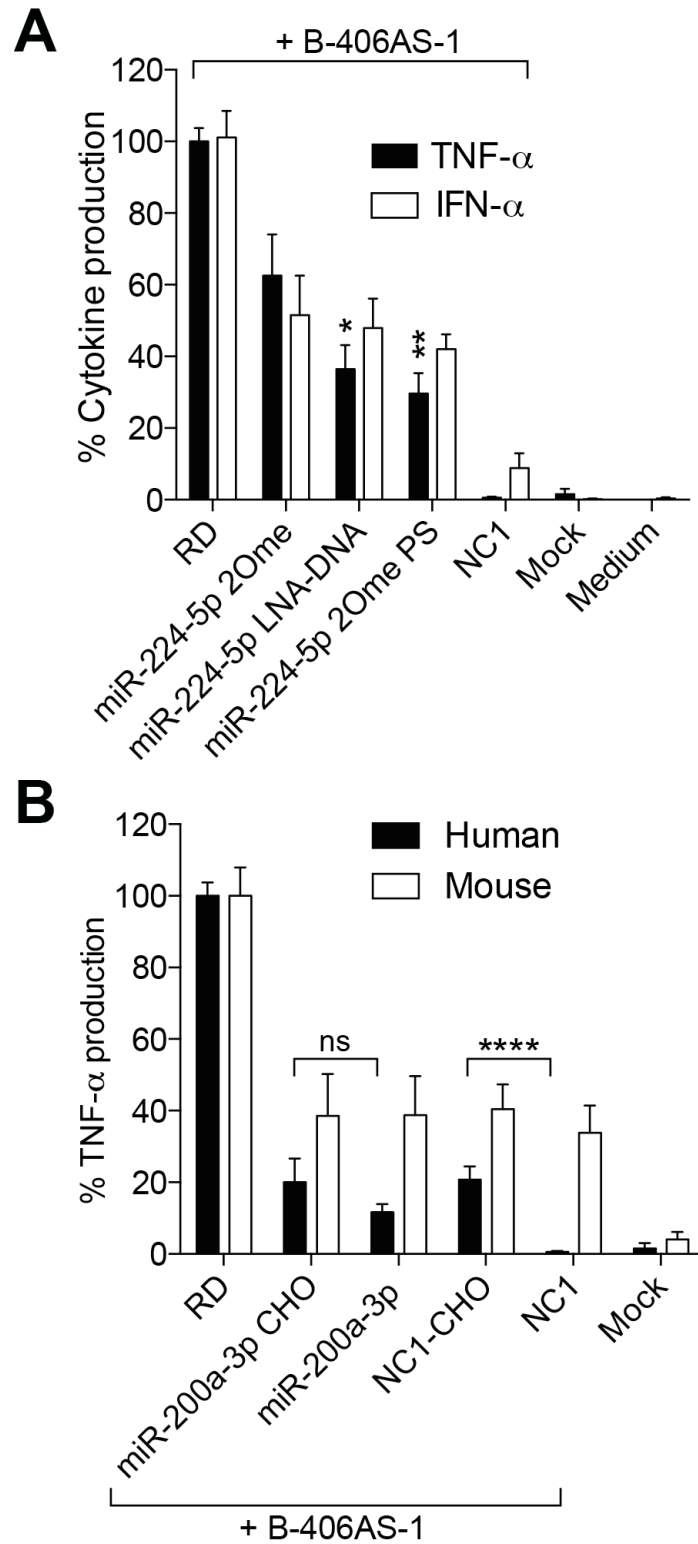

**Supplementary Figure S2.** Impact of chemistry on 2'OMe AMO inhibitory activity. Human PBMCs (**A, B**) and mouse primary BMMs (**B**) pre-treated with 40 nM of the indicated AMO for 45 min were stimulated overnight with 180 nM of B-406AS-1. Human/mouse TNF- $\alpha$  and IFN- $\alpha$  levels were measured in supernatants by ELISA. PS: phosphorothioate modified. CHO: 3'Cholesterol-modified. Percentages of cytokine production compared to the RD+B-406AS-1 condition are given. The data are averaged from a minimum of two independent experiments in three blood donors or three mice, in biological triplicate. Unpaired *t*-tests comparing miR-224-5p 2'OMe+B-406AS-1 (**A**) or miR-200a-3p/NC1+B-406AS-1 (**B**) and indicated conditions are shown ("ns": not significant).

**Supplementary Table S1.** AMO sequences used in this study

| Human miRNA target | AMO sequence 2'OMe                         | AMO sequence LNA/DNA                                    |
|--------------------|--------------------------------------------|---------------------------------------------------------|
| miR-92a-3p         | AzCAGGCCGGGACAAGUGCAAUz                    | NA                                                      |
| NC1                | GzCGUAUUUAUAGCCGAUUAACGzA                  | NA                                                      |
| miR-17-5p          | CzUACCUGCACUGUAAGCACUUUz                   | c*+T*a*c*+C*t*g*+C*a*c*+T*g*t*+A*a*g*+C*a*c*+T*t*t*+G   |
| miR-19a-3p         | UzCAGUUUUGCAUAGAUUUGCACz                   | t*c*+A*g*t*+T*t*t*+G*c*a*+T*a*g*+A*t*t*+T*g*c*+A*c*a    |
| miR-18a-5p         | CzUAUCUGCACUAGAUGCACUUz                    | c*+T*a*t*+C*t*g*+C*a*c*+T*a*g*+A*t*g*+C*a*c*+C*t*t*+A   |
| miR-224-5p         | AzACGGAACCACUAGUGACUUz                     | a*a*+C*g*g*+A*a*c*+C*a*c*+T*a*g*+T*g*a*+C*t*t*+G        |
| miR-210-3p         | UzCAGCCGCGUCACACGCACz                      | t*c*+A*g*c*+C*g*c*+T*g*t*+C*a*c*+A*c*g*+C*a*c*+A*g      |
| miR-200c-3p        | UzCCAUCAUUACCCGGCAGUAUUz                   | t*+C*c*a*+T*c*a*+T*t*a*+C*c*c*+G*g*c*+A*g*t*+A*t*t*+A   |
| miR-301a-3p        | GzCUUUGACAAUACUUAUUGCACUz                  | g*c*+T*t*t*+G*a*c*+A*a*t*+A*c*t*+A*t*t*+G*c*a*+C*t*g    |
| miR-331-3p         | UzUCUAGGAUAGGCCAGGGz                       | t*+T*c*t*+A*g*g*+A*t*a*+G*g*c*+C*c*a*+G*g*g*+G*c        |
| miR-125b-5p        | UzCACAAGUUAGGGUCUCAGGGz                    | t*+C*a*c*+A*a*g*+T*t*a*+G*g*g*+T*c*t*+C*a*g*+G*g*a      |
| miR-146a-5p        | AzACCCAUGGAAUUCAGUUCUz                     | a*a*+C*c*c*+A*t*g*+G*a*a*+T*t*c*+A*g*t*+T*c*t*+C*a      |
| miR-126-3p         | CzGCAUUUUACUCACGGUACGz                     | c*g*+C*a*t*+T*a*t*+T*a*c*+T*c*a*+C*g*g*+T*a*c*+G*a      |
| miR-134-5p         | CzCCCUCUGGUCAACCAGUCACz                    | c*c*+C*c*t*+C*t*g*+G*t*c*+A*a*c*+C*a*g*+T*c*a*+C*a      |
| miR-200a-3p        | AzCAUCGUUACAGACAGUGUUz                     | a*+C*a*t*+C*g*t*+T*a*c*+C*a*g*+A*c*a*+G*t*g*+T*t*a      |
| miR-191-5p         | CzAGCUGCUUUUGGGAUUCGGUUz                   | c*+A*g*c*+T*g*c*+T*t*t*+T*g*g*+G*a*t*+T*c*c*+G*t*t*+G   |
| miR-200b-3p        | UzCAUCAUUACAGGCAGUAUUz                     | t*c*+A*t*c*+A*t*t*+A*c*c*+A*g*g*+C*a*g*+T*a*t*+T*a      |
| miR-31-5p          | AzGCUAUGCCAGCAUCUUGCCz                     | a*g*+C*t*a*+T*g*c*+C*a*g*+C*a*t*+C*t*t*+G*c*c*+T        |
| miR-122-5p         | CzAAACACCAUUGUCACACUCCz                    | c*+A*a*a*+C*a*c*+C*a*t*+T*g*t*+C*a*c*+A*c*t*+C*c*a      |
| miR-100-5p         | CzACAAGUUCGGAUUCACGGGUz                    | c*+A*c*a*+A*g*t*+T*c*g*+G*a*t*+C*t*a*+C*g*g*+G*t*t      |
| miR-155-5p         | AzCCCCUAUCAGAUUAGCAUUz                     | a*+C*c*c*+C*t*a*+T*c*a*+C*g*a*+T*t*a*+G*c*a*+T*t*a      |
| miR-182-5p         | AzGUGUGAGUUCUACCAUUGCCAAz                  | a*+G*t*g*+T*g*a*+G*t*t*+C*t*a*+C*c*a*+T*t*g*+C*c*a*+A*a |
| miR-195-5p         | GzCCAUAUUUCUGUGCUGCUz                      | g*+C*c*a*+A*t*a*+T*t*t*+C*t*g*+T*g*c*+T*g*c*+T*a        |
| miR-15a-5p         | CzACAAACCAUUAUGUGCUGCUz                    | c*+A*c*a*+A*a*c*+C*a*t*+T*a*t*+G*t*g*+C*t*g*+C*t*a      |
| miR-24-3p          | CzUGUUCUGCUGAACUGAGCCz                     | c*+T*g*t*+T*c*c*+T*g*c*+T*g*a*+A*c*t*+G*a*g*+C*c*a      |
| miR-16-5p          | CzGCCAAUUAUUACGUGCUGCUz                    | c*g*+C*c*a*+A*t*a*+T*t*t*+A*c*g*+T*g*c*+T*g*c*+T*a      |
| miR-34a-5p         | AzCAACCAGCUAAGACACUGCCz                    | a*+C*a*a*+C*c*a*+G*c*t*+A*a*g*+A*c*a*+C*t*g*+C*c*a      |
| miR-29a-3p         | UzAACCGAUUUCAGAUUGGUGCUz                   | t*+A*a*c*+C*g*a*+T*t*t*+C*a*g*+A*t*g*+G*t*g*+C*t*a      |
| miR-27a-3p         | GzCGGAACUUAGCCACUGUGAz                     | g*c*+G*g*a*+A*c*t*+T*a*g*+C*c*a*+C*t*g*+T*g*a*+A        |
| miR-21-5p          | UzCAACAUCAGUCUGAUAAAGCUz                   | t*+C*a*a*+C*a*t*+C*a*g*+T*c*t*+G*a*t*+A*a*g*+C*t*a      |
| miR-25-3p          | UzCAGACCCGAGACAAGUGCAAUz                   | t*c*+A*g*a*+C*c*g*+A*g*a*+C*a*a*+G*t*g*+C*a*a*+T*g      |
| miR-224-5p mut1    | AzACGGAACCAUAGUGACUUz                      | NA                                                      |
| miR-224-5p mut2    | AzACGGAACCAUACUGACUUz                      | NA                                                      |
| miR-200a-3p mut1   | AzCAUCGUUCCAGACAGUGUUz                     | NA                                                      |
| miR-200a-3p mut2   | AzCAUGGUUCCCCGACAGUGUUz                    | NA                                                      |
| miR-200c-3p mut    | UzCCAUCAUUACCCGGCAGUAUUz                   | NA                                                      |
| miR-200a-3p short  | UzUACCAGACAGUGUUz                          | NA                                                      |
| miR-122-5p short   | CzCAUUGUCACACUCCz                          | NA                                                      |
| NC1 mut1           | GzCGUCUUUAUAGCCGAUUAACGzA                  | NA                                                      |
| NC1 mut2           | GzCGUCUUCUAGCCGAUUAACGzA                   | NA                                                      |
| NC1 mut3           | GzCGUCUUCUAGCCGAUUAACGzA                   | NA                                                      |
| miR-224-5p PS      | AzA*C*G*G*A*A*C*C*A*C*U*A*G*U*G*A*C*U*Uz   | NA                                                      |
| NC1-CHO            | GzCGUAUUUAUAGCCGAUUAACGzA/iSp18//3CholMEG/ | NA                                                      |
| miR-200a-3p-CHO    | AzCAUCGUUACCCAGACAGUGUUz/iSp18//3CholMEG/  | NA                                                      |

AMOs were synthesised with the following modifications: lowercase for DNA, UPPERCASE for 2'OMe, underlined for LNA, with the asterisks for phosphorothioate linkages. NA (not applicable) denotes AMOs used in Figure 1 – without LNA/DNA counterpart. “z” denotes ZEN groups (see *Materials and Methods*), “iSp18” refers to an internal spacer, while “3CholMEG” refers to a 3’Cholesterol group.

## Supplementary Table S2

| Name        | Start | <i>p</i> -value | Site       |
|-------------|-------|-----------------|------------|
| miR-182-5pR | 3     | 1.26e-06        | ACCGUUACCA |
| miR-200a-3p | 3     | 3.49e-06        | AUCGUUACCA |
| miR-122-5pR | 8     | 3.08e-05        | ACUGUUACCA |
| miR-200b-3p | 3     | 6.34e-05        | AUCAUUACCA |
| miR-25-3p   | 5     | 1.07e-04        | ACCGAGACAA |
| AMO-NC1R    | 8     | 2.03e-04        | GCCGAUAUUA |
| miR-195-5pR | 9     | 3.72e-04        | GUCUUUAUAA |

MEME analysis of all Class 2 inhibitory 2'OMe AMOs (3'-5' orientation is defined by 'R'), with enriched inhibitory motif and *P* value (39).

**Supplementary Table S3.** FIMO *in silico* prediction of AMOs with inhibitory motif based on human miRBaseV20 (40). AMO to the indicated miRNAs are in 5'-3' or 3'-5' (indicated with 'R') orientation.

| Motif | Sequence name    | Strand | Start | End | P-value  | q-value | Matched sequence |
|-------|------------------|--------|-------|-----|----------|---------|------------------|
| 1     | hsa-miR-182-5pR  | +      | 3     | 12  | 8.89E-07 | 0.0423  | ACCGTTACCA       |
| 1     | hsa-miR-200a-3p  | +      | 3     | 12  | 1.96E-06 | 0.0423  | ATCGTTACCA       |
| 1     | hsa-miR-367-3pR  | +      | 11    | 20  | 1.96E-06 | 0.0423  | ATCGTTACCA       |
| 1     | hsa-miR-183-5pR  | +      | 3     | 12  | 1.23E-05 | 0.199   | ACCGTGACCA       |
| 1     | hsa-miR-122-5pR  | +      | 8     | 17  | 1.92E-05 | 0.249   | ACTGTTACCA       |
| 1     | hsa-miR-141-3p   | +      | 3     | 12  | 2.72E-05 | 0.263   | ATCTTTACCA       |
| 1     | hsa-miR-200b-3p  | +      | 3     | 12  | 3.04E-05 | 0.263   | ATCATTACCA       |
| 1     | hsa-miR-4765R    | +      | 12    | 21  | 3.25E-05 | 0.263   | ATCGATACAA       |
| 1     | hsa-miR-1306-3pR | +      | 5     | 14  | 4.14E-05 | 0.298   | ACCGAGACCA       |
| 1     | hsa-miR-2052     | +      | 6     | 15  | 6.76E-05 | 0.438   | ACTGTTATCA       |
| 1     | hsa-miR-3923R    | +      | 4     | 13  | 7.92E-05 | 0.467   | ATCATTACAA       |
| 1     | hsa-miR-200b-3pR | +      | 11    | 20  | 9.09E-05 | 0.49    | ACCATTACTA       |
| 1     | hsa-miR-25-3p    | +      | 5     | 14  | 0.000104 | 0.509   | ACCGAGACAA       |
| 1     | hsa-miR-3591-5p  | +      | 7     | 16  | 0.00011  | 0.509   | GCCATTATCA       |
| 1     | hsa-miR-4660R    | +      | 3     | 12  | 0.000126 | 0.51    | GTCGAGACCA       |
| 1     | hsa-miR-4786-3pR | +      | 7     | 16  | 0.000126 | 0.51    | GTCGAGACCA       |
| 1     | hsa-miR-7975     | +      | 5     | 14  | 0.000141 | 0.537   | GCCGTGACTA       |
| 1     | hsa-miR-24-1-5p  | +      | 1     | 10  | 0.000155 | 0.556   | ACTGATATCA       |
| 1     | hsa-miR-4791R    | +      | 1     | 10  | 0.000181 | 0.618   | ACCTATACTA       |
| 1     | hsa-miR-6506-5pR | +      | 14    | 23  | 0.000234 | 0.756   | ACTTATACCA       |
| 1     | hsa-miR-4762-3p  | +      | 9     | 18  | 0.000274 | 0.824   | ATCTTGATCA       |
| 1     | hsa-miR-195-5pR  | +      | 9     | 18  | 0.00028  | 0.824   | GTCTTTATAA       |
| 1     | hsa-miR-4325     | +      | 3     | 12  | 0.000375 | 1       | ACTGAGACAA       |
| 1     | hsa-miR-101-5p   | +      | 10    | 19  | 0.000396 | 1       | ACTGTGATAA       |
| 1     | hsa-miR-579-3p   | +      | 8     | 17  | 0.000441 | 1       | GTTTATACCA       |
| 1     | hsa-miR-3913-5p  | +      | 5     | 14  | 0.000469 | 1       | ATCAAGATCA       |
| 1     | hsa-miR-4779     | +      | 3     | 12  | 0.000474 | 1       | GCTTTTACTA       |
| 1     | hsa-miR-3937R    | +      | 12    | 21  | 0.000481 | 1       | ATCGTTACCC       |
| 1     | hsa-miR-6075R    | +      | 11    | 20  | 0.000516 | 1       | GCCGTAACCA       |
| 1     | hsa-miR-548f-5p  | +      | 5     | 14  | 0.000534 | 1       | ACTGTGATTA       |
| 1     | hsa-miR-4795-5pR | +      | 10    | 19  | 0.000543 | 1       | ATTATTATAA       |
| 1     | hsa-miR-1248     | +      | 12    | 21  | 0.000553 | 1       | GCTTATACAA       |
| 1     | hsa-miR-1294R    | +      | 9     | 18  | 0.000575 | 1       | ACCGTAACAA       |
| 1     | hsa-miR-132-3pR  | +      | 11    | 20  | 0.000592 | 1       | GTCGGTACCA       |
| 1     | hsa-miR-92a-1-5p | +      | 10    | 19  | 0.000615 | 1       | ACCGATCCCA       |
| 1     | hsa-miR-184      | +      | 1     | 10  | 0.000617 | 1       | ACCCTTATCA       |
| 1     | hsa-miR-5588-5pR | +      | 3     | 12  | 0.000621 | 1       | ACCGTAATCA       |
| 1     | hsa-miR-4518     | +      | 8     | 17  | 0.000672 | 1       | ACAGTTATCA       |
| 1     | hsa-miR-3160-5p  | +      | 6     | 15  | 0.000702 | 1       | GCTGAGACTA       |
| 1     | hsa-miR-8068     | +      | 7     | 16  | 0.000702 | 1       | ATCCTTACAA       |
| 1     | hsa-miR-648R     | +      | 10    | 19  | 0.000712 | 1       | CCC GTGACCA      |
| 1     | hsa-miR-548as-3p | +      | 10    | 19  | 0.000716 | 1       | GTTAATACAA       |
| 1     | hsa-miR-6883-5p  | +      | 3     | 12  | 0.000723 | 1       | ATCCATACCA       |
| 1     | hsa-miR-331-5pR  | +      | 2     | 11  | 0.000723 | 1       | ATCCATACCA       |
| 1     | hsa-miR-3668     | +      | 1     | 10  | 0.000742 | 1       | ATTTTGATCA       |
| 1     | hsa-miR-4703-5pR | +      | 14    | 23  | 0.000756 | 1       | GTTTATATCA       |
| 1     | hsa-miR-301a-3p  | +      | 1     | 10  | 0.000767 | 1       | GCTTTGACAA       |
| 1     | hsa-miR-301b     | +      | 1     | 10  | 0.000767 | 1       | GCTTTGACAA       |
| 1     | hsa-miR-147aR    | +      | 6     | 15  | 0.000767 | 1       | ACCTTTACGA       |
| 1     | hsa-miR-509-3-5p | +      | 12    | 21  | 0.000781 | 1       | ACCGTTAGTA       |
| 1     | hsa-miR-4657R    | +      | 5     | 14  | 0.000868 | 1       | ACCTTCACCA       |

|   |                 |   |    |    |          |   |            |
|---|-----------------|---|----|----|----------|---|------------|
| 1 | hsa-miR-4775    | + | 5  | 14 | 0.000936 | 1 | ACCGAAACAA |
| 1 | hsa-miR-182-5p  | + | 13 | 22 | 0.000949 | 1 | ACCATTGCCA |
| 1 | hsa-miR-27a-3pR | + | 8  | 17 | 0.000988 | 1 | ACCGATTCAA |
| 1 | hsa-miR-27b-3pR | + | 8  | 17 | 0.000988 | 1 | ACCGATTCAA |
